# Supplementary material for: Safety, Feasibility, and Impact of Enalapril on Cardiorespiratory Physiology and Health in Preterm Infants with Systemic Hypertension and Left Ventricular Diastolic Dysfunction
Source: MDPI journal article supplement (doi:10.3390/jcm10194519), 2021-09-29

**Supplementary Figure S1:** Approach to Hemodynamic Care of Premature Infants with Later Systemic Hypertension

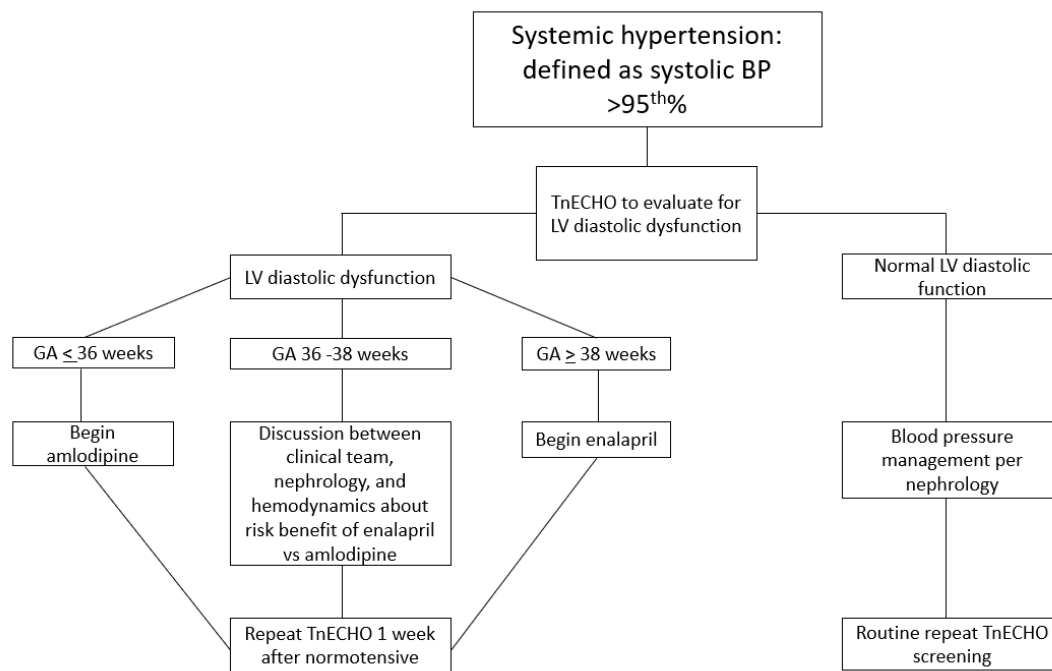

Supplement: s1 [file s1]
